# Supplementary material for: Adjusting the band structure and defects of ZnO quantum dots via tin doping
Source: Royal Society of Chemistry journal article supplement (doi:10.1039/c6ra25940e), 2017-01-01
Supplement: c6ra25940e1.pdf [file c6ra25940e1.pdf]

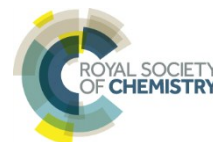

Journal name

ARTICLE

## Supporting Material for

Received 00th January 20xx,  
Accepted 00th January 20xx

DOI: 10.1039/x0xx00000x

[www.rsc.org/](http://www.rsc.org/)

## Adjust the band structure and defects of ZnO quantum dots via tin doping

### This PDF file includes:

Figs. s1 to s6

<sup>a</sup> College of Materials Science and Engineering, Nanjing Tech University, Nanjing 210009, China

<sup>b</sup> Jiangsu Collaborative Innovation Center for Advanced Inorganic Function Composites, Nanjing Tech University, Nanjing 210009, China

<sup>c</sup> School of Materials Science and Engineering, Georgia Institute of Technology, 771 Ferst Drive, Atlanta, GA 30332, USA

<sup>d</sup> Faculty of Engineering, The Chinese University of Hong Kong, Shatin 999077, Hong Kong, China

DOI: 10.1039/x0xx00000x

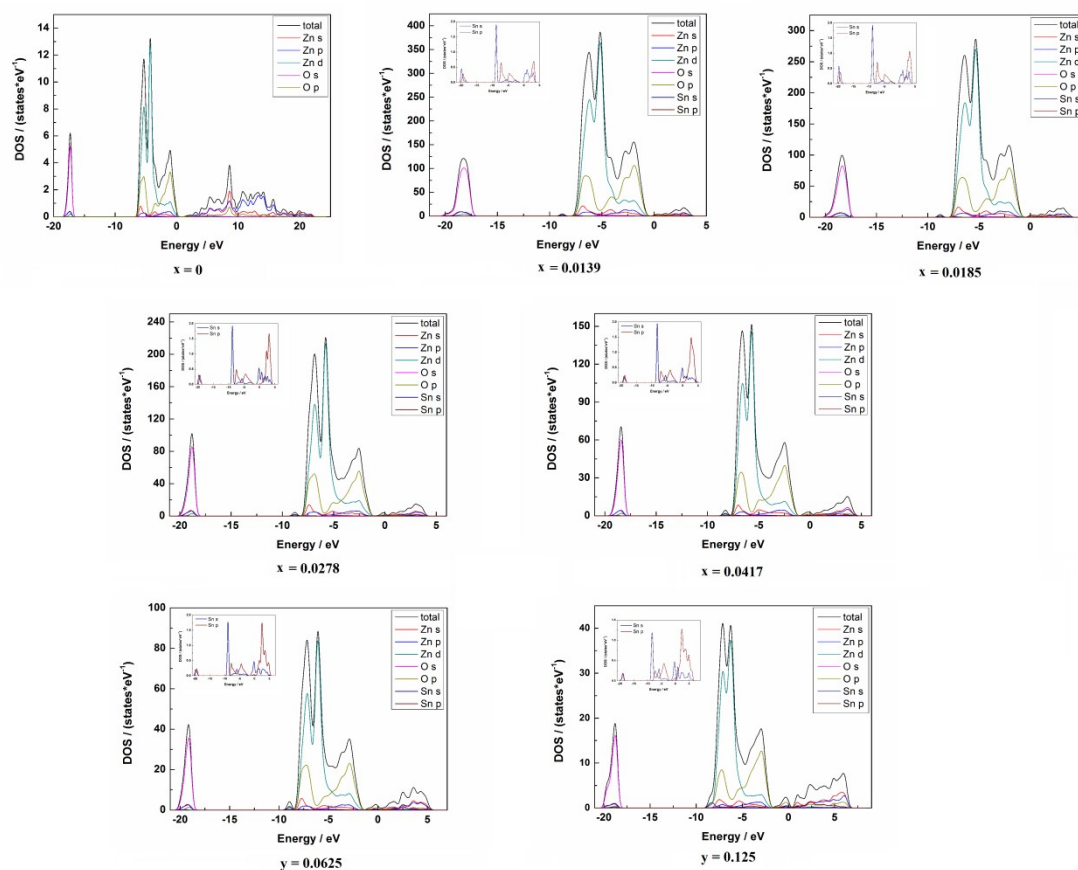

Figure s1 Calculated total DOS and partial DOS of  $\text{Zn}_{1-x}\text{Sn}_x\text{O}$ . (Small Figures on the upper left are PDOS of  $\text{Sn}^{2+}$ )

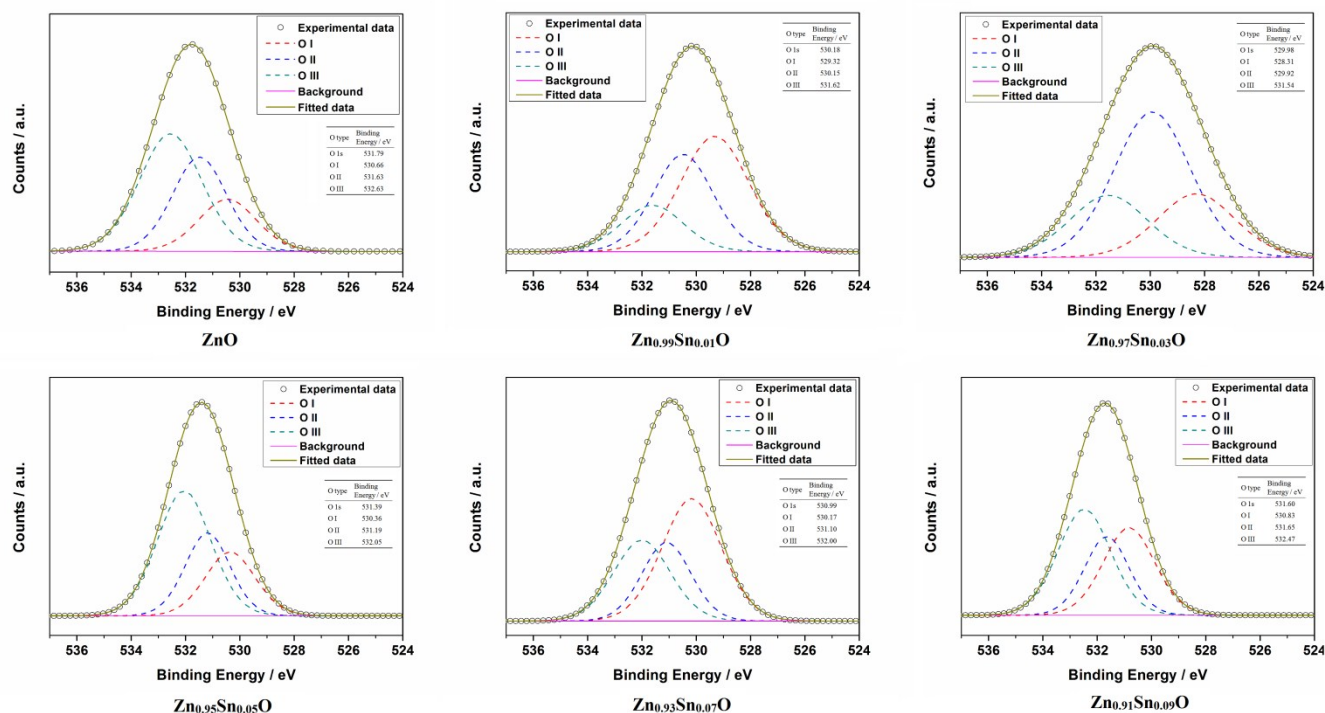

Figure s2 O 1s XPS spectra of Zn<sub>1-x</sub>Sn<sub>x</sub>O QDs synthesized in 40 °C with 180 W ultrasonic power for 30 min.

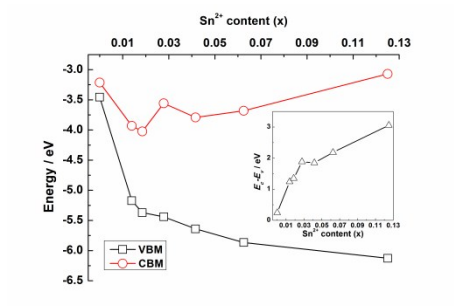

Figure s3 Orbital properties of  $\text{Sn}^{2+}$  doping  $\text{ZnO}$ .

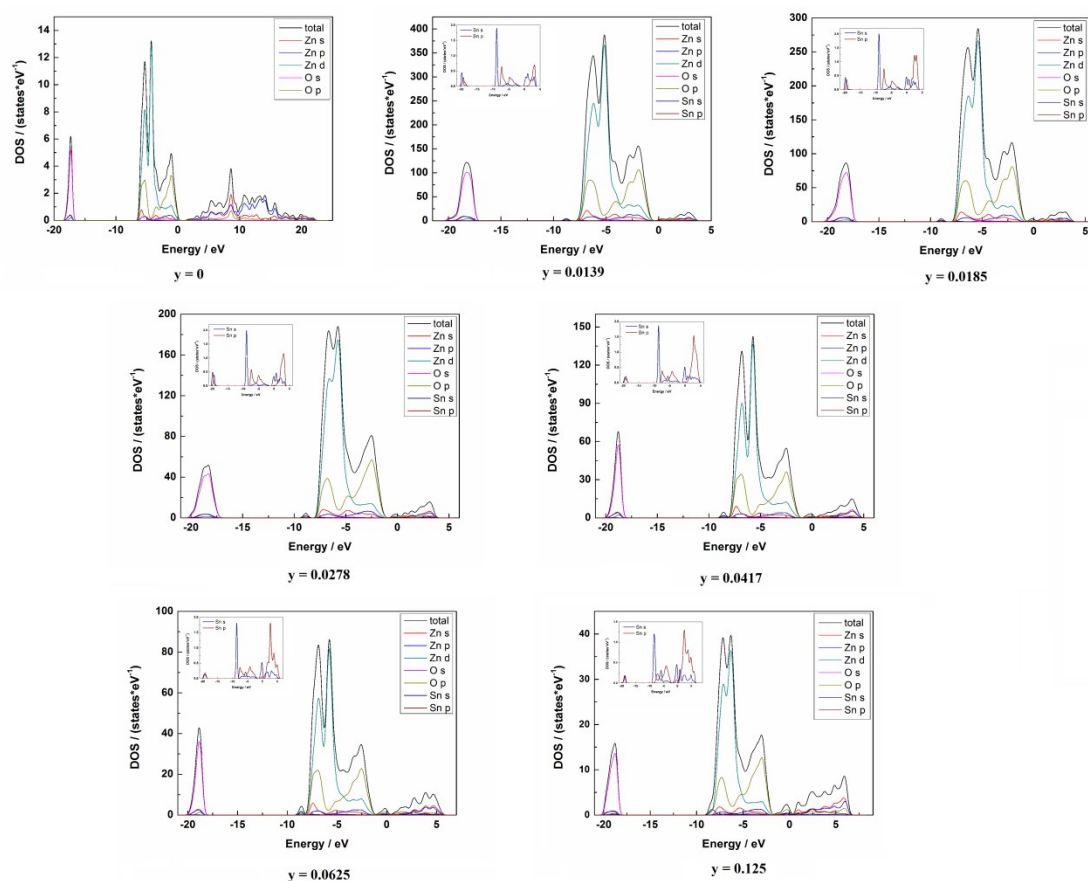

Figure s4 Calculated total DOS and partial DOS of  $\text{Zn}_{1-y}\text{Sn}_y\text{O}$ . (Small Figures on the upper left are PDOS of  $\text{Sn}^{4+}$ )

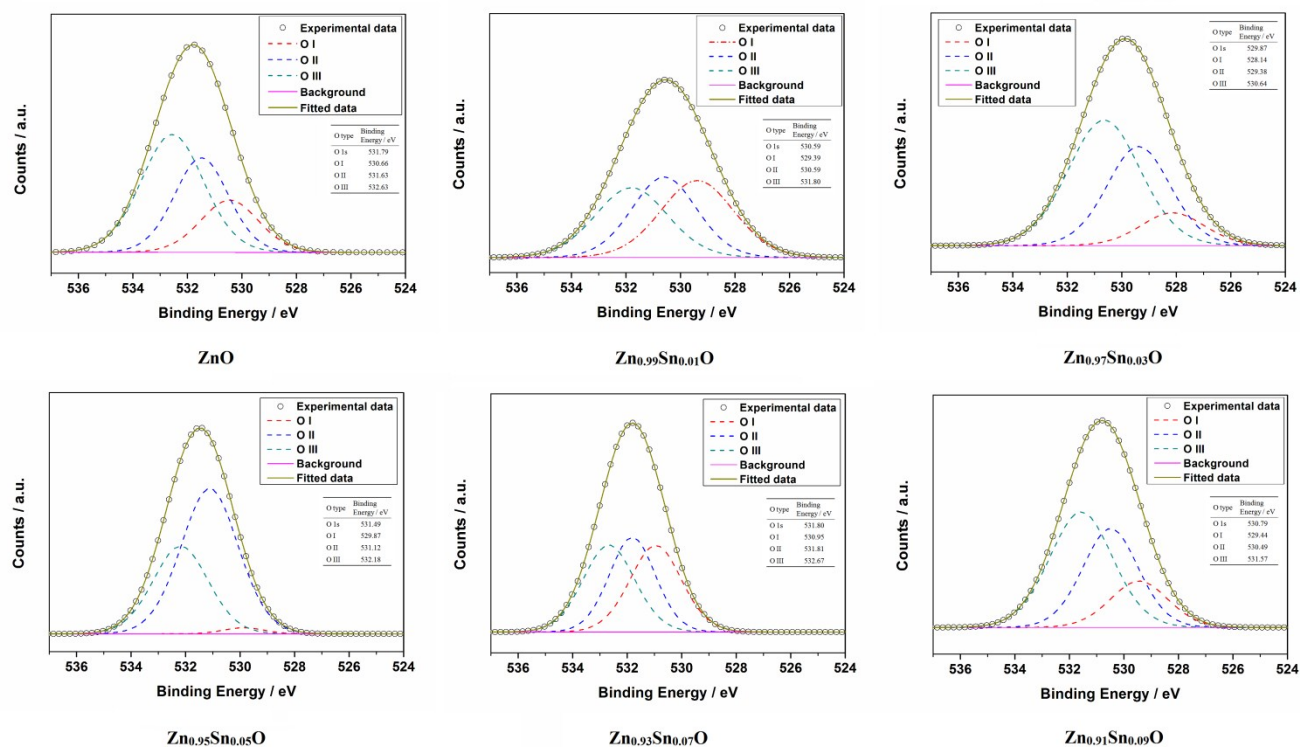

Figure S5 O 1s XPS spectra of Zn<sub>1-y</sub>SnyO QDs synthesized in 40 °C with 180 W ultrasonic power for 30 min.

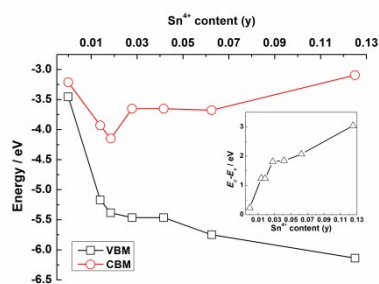

Figure s6 Orbital properties of  $\text{Sn}^{4+}$  doping  $\text{ZnO}$ .
